# Supplementary material for: Disruption of PKB signaling restores polarity to cells lacking tumor suppressor PTEN
Source: PubMed Central journal article supplement — Mol Biol Cell. 2011 Feb 15;22(4):437–47. doi: 10.1091/mbc.E10-06-0522 (PMC3038642; doi:10.1091/mbc.e10-06-0522), 2011-02-15
Supplement: E10-06-0522_1.pdf [file E10-06-0522_1.pdf]

**A**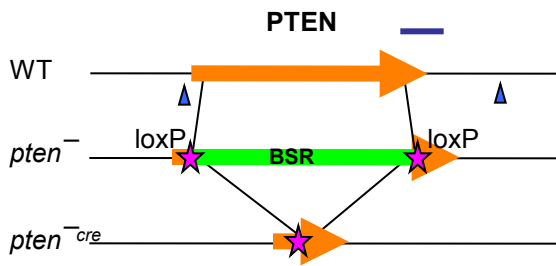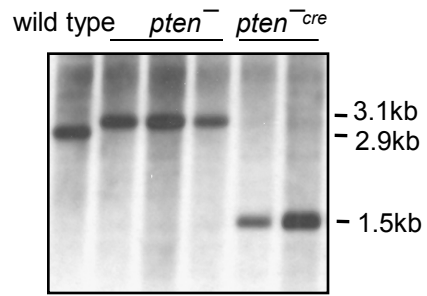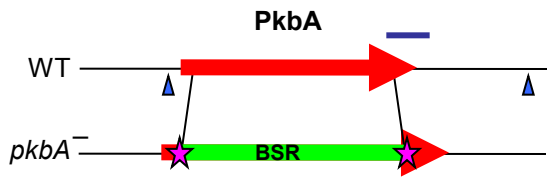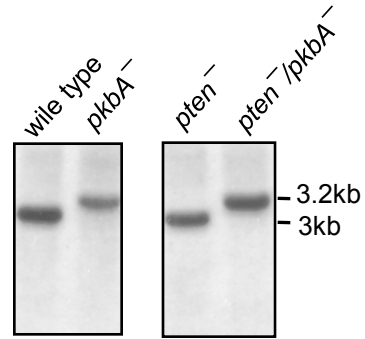**B**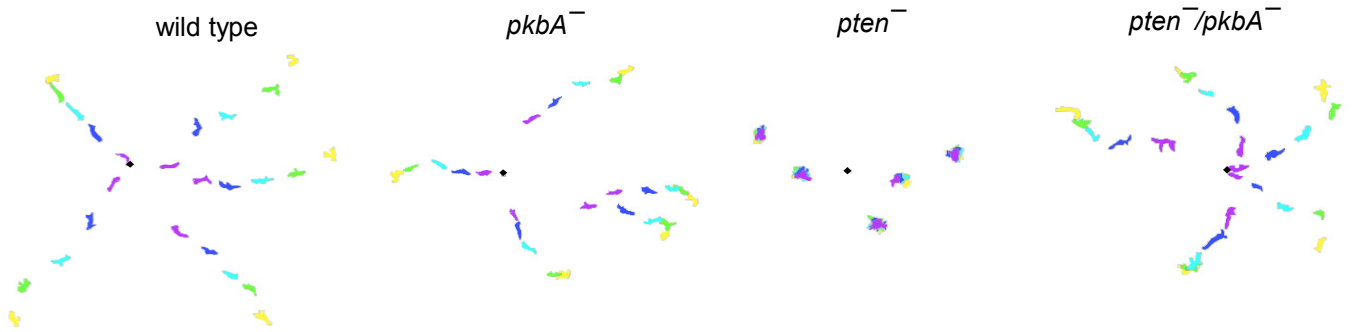

Figure S1

Figure S1: (A) Disruption of PTEN and PKBA. Purple stars represent loxP sites. Blue triangles indicate the restriction digest sites of EcoRV and EcoRI. Blue bar shows the location of southern probe. Results of the southern blots are shown on the right.

(B) Chemotaxis assays of wild type,  $pkbA^-$ ,  $pten^-$  and  $pten^-/pkbA^-$  cells. Outlines of five representative cells moving toward micropipette were prepared at 7.5 min intervals and overlaid as different colors.

**A**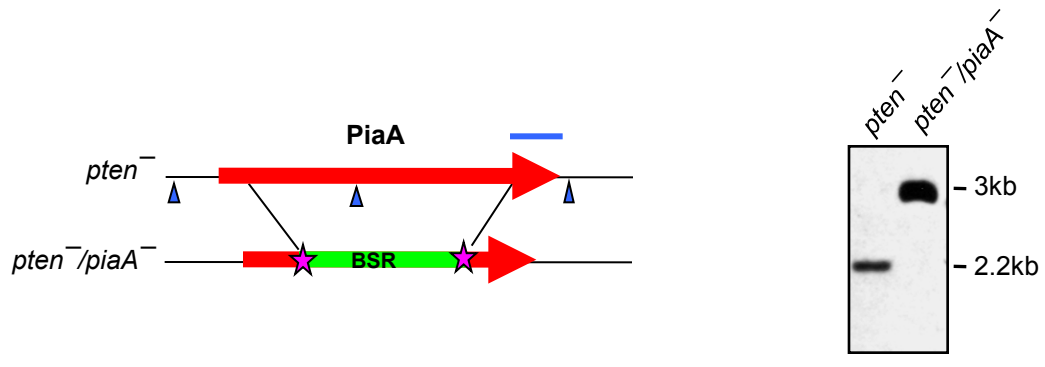**B**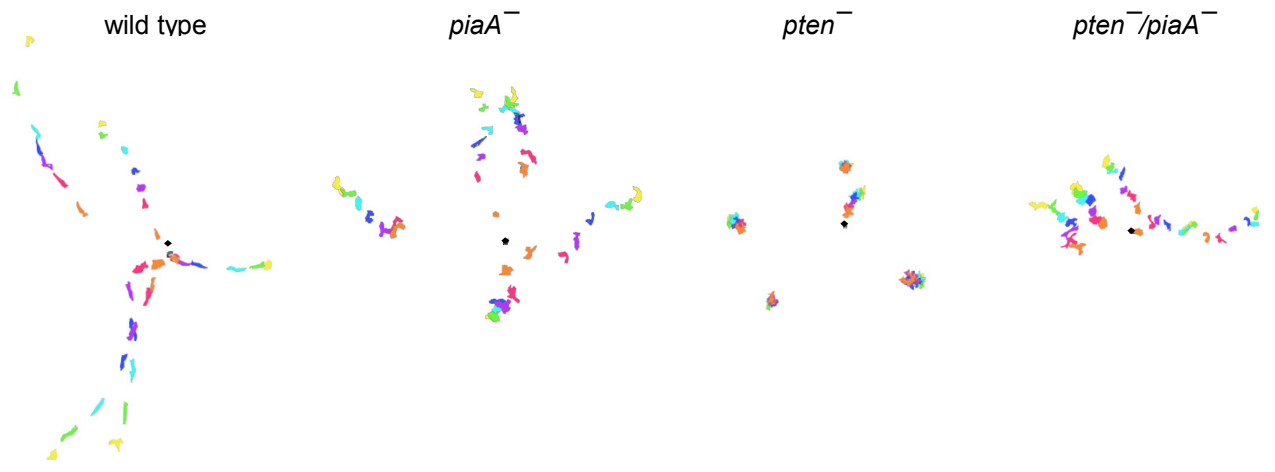

Figure S2

Figure S2: (A) Disruption of PiaA in *pten*<sup>-</sup> cells. Purple stars represent loxP sites. Blue triangle and bar indicate the BclI digestion sites and location of the southern probe, respectively. Results of the southern blot are shown on the right.

(B) Chemotaxis assay of wild type, *piaA*<sup>-</sup>, *pten*<sup>-</sup>, and *pten*<sup>-</sup>/*piaA*<sup>-</sup> cells. Outlines of five representative cells moving toward micropipette were prepared at 7.5 min intervals and overlaid as different colors

**A**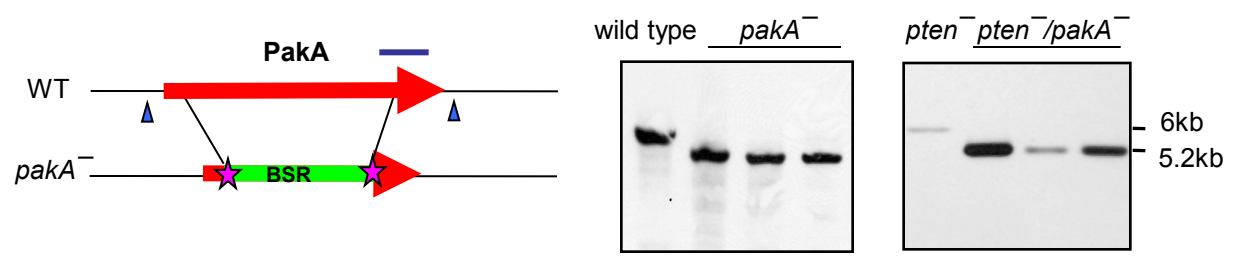**B**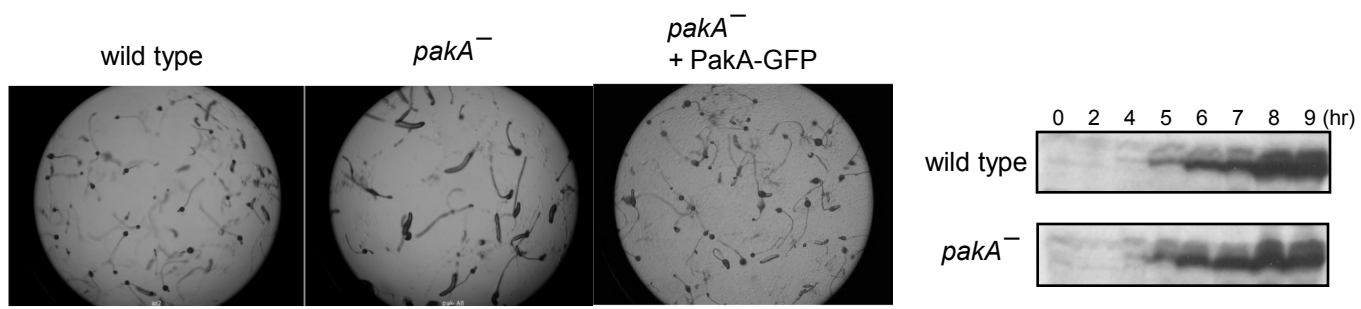

Figure S3

Figure S3: (A) Disruption of PakA in wild type or *pten*<sup>-</sup> cells. Blue triangle and bar indicate the BclI digestion sites and location of the southern probe, respectively.

Results of the southern blots are shown on the right.

(B) Disruption of PakA in wild type causes delayed fruiting body formation on non-nutrient agar.  $1 \times 10^7$  cells/ml of each indicated cell line were plated on non-nutrient agar and images were taken after 18 hours of starvation. Expression of PakA-GFP in *pakA*<sup>-</sup> restores the wild type phenotype. Western blot of cAR1 expression was shown on the right.

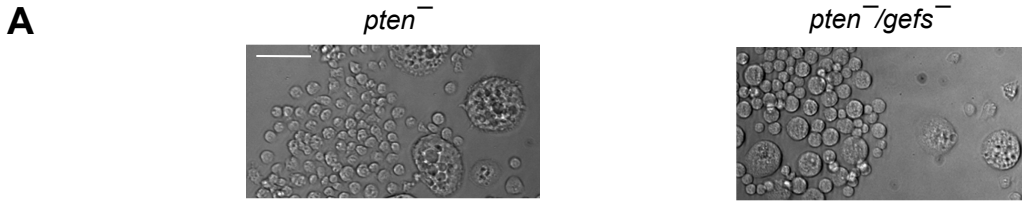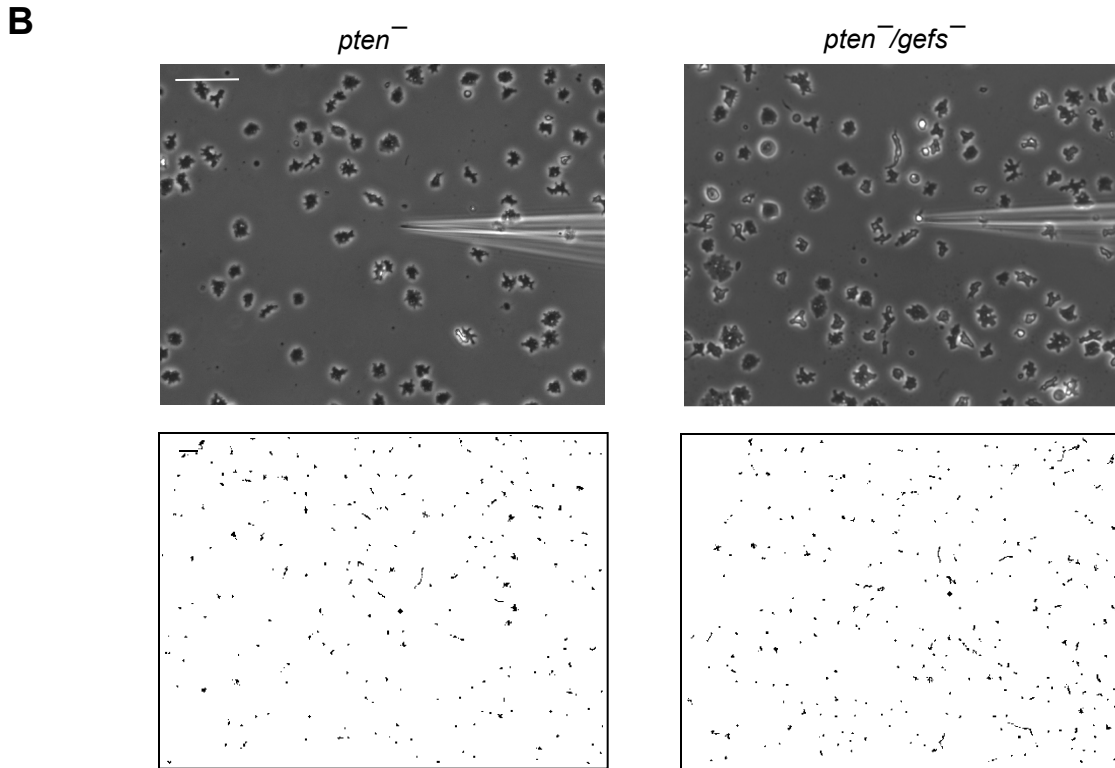

|                           | <i>pten</i> <sup>-</sup> | <i>pten</i> <sup>-</sup> / <i>gefs</i> <sup>-</sup> |
|---------------------------|--------------------------|-----------------------------------------------------|
| motility speed (μm/min)   | 1.63 ±0.29               | 1.66 ±0.23                                          |
| chemotaxis speed (μm/min) | 0.10 ±0.14               | 0.04 ±0.01                                          |
| chemotaxis index          | 0.09 ±0.11               | 0.03 ±0.01                                          |
| persistence               | 0.16 ±0.06               | 0.12 ±0.03                                          |

Average and standard deviation of at least three movies for each cell line are calculated using software provided by Y.Xiong and P.A. Iglesias. Please see Material and methods for the definition of these parameters.

Figure S4

Figure S4: (A) representative images of  $pten^-$  and  $pten^-/gefs^-$  cells growing on glass substrates. . Bar, 50  $\mu\text{m}$ .

(B) Chemotaxis assay of  $pten^-$  and  $pten^-/gefs^-$  cells. Upper panels show images at 45 min after chemotaxis was initiated. Lower panels show trajectories of the entire recording field. The black diamond indicates the location of micropipette tip. Bar, 50  $\mu\text{m}$ .



**Table S1: Mass Spectrometry Identification of PKB substrates**

| Gene name & DDB number | PKB phosphorylation site | Peptide identified in mass spec | Expect  |
|------------------------|--------------------------|---------------------------------|---------|
| GacG<br>DDB 0233879    | RRRTSS <sup>365</sup>    | FLSEVSQSAYTNK                   | 3e-09   |
|                        | RERSSS <sup>480</sup>    | TNTIFGVDPNTIVSK                 | 6.9e-08 |
|                        |                          | NNGNEVIQSSSSTSSPR               | 1.8e-07 |
|                        |                          | LNLTENNLNNSSTSSSPR              | 3.7e-10 |
| PakA<br>DDB 0191313    | RSRSH <sup>585</sup>     | IGEGGAGEVFEAINSR                | 1.4e-06 |
|                        |                          | LADFGYAAQLTQIR                  | 0.015   |

**Table S2: Primer List**

|                  | name   | sequences                                |
|------------------|--------|------------------------------------------|
| PTEN disruption  | Ppten1 | GCGGCCGCTCACATTGCAATTTTAAGAGCACAG        |
|                  | Ppten2 | CCCGGGTACATGCTAAATCTAAATCGTAACC          |
|                  | Ppten3 | CCCGGGATCCACAATCCTCAAATAATGTAGC          |
|                  | Ppten4 | GTCGACTGGAATTCACCTTCAAATGGACACG          |
| PkbA disruption  | Ppkba1 | GTCGCACTTTGCAAACCAAAGACAATAACTGC         |
|                  | Ppkba2 | CCCGGGACCACCTTTGAGAATGAACCATCTC          |
|                  | Ppkba3 | CCCGGGCTTTAACTATGGCTGGTGAATGTGC          |
|                  | Ppkba4 | GCGGCGCCTTCTGAAAATGGGTCTAATGGATC         |
| PkbR1 Disruption | Ppkbr1 | GAAAGTCGACACAATTTAACCTATTACATCTCCG       |
|                  | Ppkbr2 | GAAACCCGGGTTTGGCGGGTTTACCTGATCCTCC       |
|                  | Ppkbr3 | GAAACCCGGGTCTTCTCTATGAGATGTAACTGG        |
|                  | Ppkbr4 | GAAAGCGCCGCTTAATCCTTTAAGATTGAATCAGC      |
| PiaA disruption  | YK118  | GACAAGCTTTGATAGTAGTGTAATACTACATCG        |
|                  | YK119  | CTCATTACTCTTAACCCGGGTGTTCTAATTG          |
|                  | YK120  | CACTATCATTGAATGTCCCGGGTGAGGCATG          |
|                  | YK121  | ATCATAAATGAAGCTTCTAGCACCTAAACG           |
| PakA disruption  | MT60   | GAAAAGAAATCTCATTTCATATTTTAAAG            |
|                  | MT61   | TATTGCCCGGGTTTGTACCTCATTGAATTGACC        |
|                  | MT62   | ACAAACCCGGGCAATATCGTGATATCCAATTG         |
|                  | MT63   | CAATTCTTGCGAGCATCAACAGCTT                |
| PakA cloning     | MT64   | GGGATCCATGGAAGAGAAACCAAAAAGTACAACCTCC    |
|                  | MT47   | CTTCTTGTCTTCTACGCGATGCCAATTCTCTC         |
|                  | MT43   | GGCATCGCGTAGAAGACAAGAAGAAG               |
|                  | MT41   | GCTCGAGGGAATTGCAGTTAAATTAGC              |
| PakA T585A       | MT72   | GGTCACGTAGTCATGCTTTGGCTGGTG              |
|                  | MT73   | CACCAGCCAAAGCATGACTACGTGACC              |
| PakA T585E       | MT74   | GGTCACGTAGTCATGCTTTGGCTGGTG              |
|                  | MT75   | CACCAGCCAAAGCATGACTACGTGACC              |
| GacG cloning     | MT65   | GGGATCCATGGCGTCAATATTTTTAAATAAAAAACAATAG |
|                  | MT53   | GCTCGAGGGCTCTTCAACAATATCAGTTAAAG         |

**Video 1: Chemotaxis assay of wild type cells.** Chemotactically competent cells were allowed to attach to the glass in a one-well Lab-Tek chamber. Micropipette was filled with 10 $\mu$ M cAMP and the cell movement was recorded every 30 sec for 45 min. The video was played at 8fps. Related to Figure 1C, 2C and 5D.

**Video 2: Chemotaxis assay of *pkbA*<sup>-</sup> cells.** All conditions were exactly the same as for video 1 except total recording time was 30 min. Related to Figure 1C.

**Video 3: Chemotaxis assay of *pten*<sup>-</sup> cells.** All conditions were exactly the same as for video 1. Related to Figure 1C, 2C and 5D.

**Video 4: Chemotaxis assay of *pten*<sup>-</sup>/*pkbA*<sup>-</sup> cells.** All conditions were exactly the same as for video 1 except total recording time was 30 min. Related to Figure 1C.

**Video 5: Chemotaxis assay of *piaA*<sup>-</sup> cells.** All conditions were exactly the same as for video 1. Related to Figure 2C.

**Video 6: Chemotaxis assay of *pten*<sup>-</sup>/*piaA*<sup>-</sup> cells.** All conditions were exactly the same as for video 1. Related to Figure 2C.

**Video 7: PHcrac-GFP and LimE $\Delta$ coil-RFP in wild type cells.** Cells transformed with PHcrac-GFP were developed to the chemotactically competent stage and cell movement was recorded at every 5 sec for 2.5min. The video was played at 5fps. Related to Figure 3

**Video 8: PHcrac-GFP and LimE $\Delta$ coil-RFP in *pten*<sup>-</sup> cells .** All conditions were exactly the same as for video 7. Related to Figure 3

**Video 9: PHcrac-GFP and LimE $\Delta$ coil-RFP in *pten*<sup>-</sup>/*pkbA*<sup>-</sup> cells.** All conditions were exactly the same as for video 7. Related to Figure 3

**Video 10: PHcrac-GFP and LimE $\Delta$ coil-RFP in *pten*<sup>-</sup>/*piaA*<sup>-</sup> cells.** All conditions were exactly the same as for video 7. Related to Figure 3

**Video 11: Chemotaxis assay of *pakA*<sup>-</sup> cells.** All conditions were exactly the same as for video 1. Related to Figure 5D.

**Video 12: Chemotaxis assay of *pten*<sup>-</sup>/*pakA*<sup>-</sup> cells.** All conditions were exactly the same as for video 1. Related to Figure 5D.

**Video 13: Chemotaxis assay of *pten*<sup>-</sup>/*pakA*<sup>-</sup> cells expressing PakA<sup>T585A</sup>-GFP.** All conditions were exactly the same as for video 1. Related to Figure 6B.

**Video 14: Chemotaxis assay of *pten*<sup>-</sup>/*pakA*<sup>-</sup> cells expressing PakA<sup>T585E</sup>-GFP.** All conditions were exactly the same as for video 1. Related to Figure 6B.
